# 1 **ETAPOD: A forecast model for prediction of black pod disease**

## 2 **Outbreak in Nigeria**

3 Peter M. Etaware<sup>1\*</sup>

4 Adegboyega R. Adedeji<sup>2</sup>

5 Oyedeji I. Osowole<sup>3</sup>

6 Adegboyega C. Odebode<sup>1</sup>

7 <sup>1</sup> Department of Botany, Faculty of Science, University of Ibadan, Ibadan, Nigeria

8 <sup>2</sup> Cocoa Research Institute of Nigeria (CRIN), Idi-Ayunre, Ibadan, Nigeria

9 <sup>3</sup> Department of Statistics, Faculty of Science, University of Ibadan, Ibadan, Nigeria

10

11 \* Corresponding Author

12 Email: peterparkers007@gmail.com

13

14

15

16

17

18

19

20

21

## 22 Abstract

23 The misuse of toxic fungicides by indigenous cocoa farmers in Nigeria stem from their inability to  
24 predict the time for black pod disease (BPD) outbreak. Prediction of possible time for BPD outbreak  
25 will provide spotlight on areas under massive BPD invasion, minimise fungicide misuse and increase  
26 control accuracy. The Multiple Regression Model (MRM):  $Y=\alpha+\beta_1X_1+\beta_2X_2+\dots+\beta_nX_n$  where Y is Nx1  
27 matrix of response variable,  $X_1, X_2, \dots, X_n$  are NxK matrices of regressors, and  $\beta_1, \beta_2, \dots, \beta_n$  regression  
28 coefficients was used in model development. Eight models (MRM<sub>1</sub>-MRM<sub>8</sub>) were fitted from real life  
29 BPD data. The performances of the models were ascertained using SER, RMSE<sub>pred</sub> and R-Sq<sub>Adj</sub>.  
30 Prediction(s) made by the best fitted model was compared to real life observations (Monthly BPD  
31 Occurrence (MBO), Total Annual Occurrence (TAO), and Average Annual Occurrence (AAO),  
32 respectively). The preferred model was MRM<sub>5</sub> (ETAPOD) followed by MRM<sub>4</sub>, MRM<sub>1</sub>, MRM<sub>2</sub>, and  
33 MRM<sub>3</sub> in terms of SER (0.22, 0.39, 0.45, 0.45 and 0.45), RMSE<sub>pred</sub> (0.30, 0.39, 0.46, 0.46 and 0.46) and  
34 R-Sq<sub>Adj</sub> (0.67, 0.49, 0.32, 0.32, and 0.31), respectively. Predictions on BPD outbreak made by ETAPOD  
35 showed that MBO, TAO and AAO for some selected stations i.e. Qwenà and Wáàsimi were 9.05, 72.3  
36 and 6.0% compared with observed BPD values of 9.5, 70.0, and 5.8%, respectively. Adaàgbà,  
37 Iyánfoworogì, and Owódé-Igàngán had 9.43, 77.8, and 6.5% as their predicted BPD values compared  
38 with the observed values of 9.0, 53.5, and 4.46%, respectively. ETAPOD performed better than other  
39 models and its predicted values were within the range of real life occurrence.

40 **Keywords:** ETAPOD, Standard Error of Regression, Fungicide misuse, Multiple regression models,  
41 Disease Invasion

42

43

44

## 45 **Introduction**

46 Black pod disease of *Theobroma cacao* Linn. (Cocoa) is a major challenge to farmers worldwide. The  
47 disease is more established in West Africa than in any other parts of the world. As a result of the  
48 disease, most indigenous cocoa farmers seemingly have no enthusiasm in establishing new farms in  
49 areas where black pod disease outbreak is extreme [1] and cocoa farmlands are rapidly being abandoned  
50 [2]. Adegbola [3] in his review of Africa estimated the average occurrence of the disease as 40% in  
51 several parts of West Africa and up to 90% in certain places in Nigeria [4].

52 Global climate change is one of the major factors responsible for the irregular occurrence of this disease  
53 worldwide due to its influence on the survival and proliferation of the pathogen and the predisposition  
54 of unripe and ripe cocoa pods to fungal attack. The irregular rainfall pattern and inconsistent mode of  
55 black pod disease occurrence in Nigeria makes it nearly impossible to control it effectively. The success  
56 rate achieved by both biological and chemical control measures is fast declining due to high level of  
57 adaptation of the pathogen to harsh conditions, climate change and an increase in vulnerability of cocoa  
58 plants. Hence, an urgent need for modern approach in the control of black pod disease in West Africa is  
59 imminent.

60 Plant disease forecasting (which is a modern day plant disease control strategy) advocates the use of  
61 plethora management techniques directed by a rational system for predicting the risk of disease  
62 outbreaks such that farmers will be duly informed and maximally equipped either to avert or tackle the  
63 impending epidemics. This research work seeks to develop a forecast system for black pod disease  
64 prediction in order to provide useful and timely information on black pod disease outbreak. This will  
65 minimize fungicide misuse, increase cocoa productivity, and reduce the risk of chemical poisoning.  
66 Unless concerted efforts are made to effectively manage the disease [5], black pod disease epidemics  
67 will greatly reduce cocoa production in Nigeria and around the world [1].

## 68 **Materials and Methods**

### 69 **Research location**

70 Twelve study locations within Southwest, Nigeria were selected i.e. Oṡwenà (Two study locations) and  
71 Wààsimi (Ondo East Local Government Area, Ondo State), Adaàgbà and Iyánfoworogi (Ife South  
72 L.G.A, Osun State), two study locations in Owódé-Igàngán (Àtàkúnmòsà East L.G.A., Osun State), two  
73 study locations in Oṡáfemi-Owóde L.G.A., Ogun State, Mòyè village Oṡnà-Arà LGA, Dáagi-Lógbà  
74 (Atère Village) in Omi-Adió area of Ìddó LGA, and Olórò Village (also known as Olorunda village) in  
75 Àkànràn, Oṡnà-Arà LGA of Oyo State, with the exception of Ekiti and Lagos States (Table 1).

### 76 **The co-ordinates of the research locations**

77 The co-ordinates of the study areas were determined using the blackberry mobile Global Positioning  
78 System (GPS) device (version 6.0) and a mobile satellite GPS receiver model GARMIN Etrex 10  
79 obtained from the Department of Botany, Faculty of Science, University of Ibadan, Ibadan, Nigeria. The  
80 farm size was measured using a surveyor's measuring tape (100ft by 30m) Lufkin FM100CME 2-Sided,  
81 Metric/English 13mm ½ inch x (Fig 1).

### 82 **Fig 1: Coordinates of cocoa farm site where primary data were collected for this research**

83

### 84 **Black pod disease data**

85 Documented reports of black pod disease outbreaks within Southwestern Nigeria was obtained from  
86 Cocoa Research Institute of Nigeria (CRIN), Ìdí-Ayunre, Ibadan, Oyo State, Nigeria and the report of  
87 Lawal and Emaku [6]. The total data collected spanned from 1985 to 2014. These served as the  
88 secondary data while the primary data were directly collected in the field during disease assessment  
89 (2015/2016).

## 90 **Meteorological data**

91 Weather data from 1985 to 2014 were also collected from the National Bureau of Statistics (NBS)  
92 Ibadan, Oyo State, the Meteorological Station of Cocoa Research Institute of Nigeria (CRIN), Ìdí-  
93 Ayunrẹ, Ibadan, Oyo State, Nigerian Meteorological Station (Nimet), Nigerian Institute for Oil palm  
94 Research (NIFOR), Benin City, Edo State, Nigeria, and the Department of Geography, University of  
95 Ibadan, Ibadan, Oyo State, Nigeria. These were also classified as secondary data.

## 96 **Forecast model structuring**

97 The secondary data (BPD outbreak and weather data) were used in the structuring of the proposed  
98 forecast model, while the primary data gotten directly from the field (2015/2016) was used to validate  
99 the predicted results for black pod disease outbreak by the developed model for the same period. The  
100 template for validation was stated in Table 2.

## 101 **Data Analysis**

102 The proposed forecast model(s) were templates of multiple regression equation(s) developed from the  
103 meteorological data and previous black pod disease records collected (Secondary data), designed using  
104 Minitab 16.0 software and programmed on Microsoft Excel Worksheet 2007 service pack for easy  
105 access. The validity of the developed models was tested using Pearson's Product Moment of Correlation  
106 (PPM) to determine the Coefficient of Correlation (R-Sq), and the Adjusted Coefficient of Correlation  
107 of the Developed Models (R-Sq<sub>Adj</sub>). The Standard Error of Regression (SER) and Root Mean Square  
108 Error of Prediction (RMSE<sub>pred</sub>) were also determined as a valid tool for black pod disease forecast  
109 model selection.

110 Predicted results of black pod disease outbreak were validated using the observations made on the field  
111 (Primary data) during the 2015/2016 black pod disease assessments in the study areas. The Error of in

112 prediction was also determined using  $E=(Y-\hat{Y})^2$ . Qualitative data were represented as charts and graphs  
113 plotted using SPSS, version 20.0 for 32 bits resolution, while the analysis of variance was carried out  
114 using COSTAT 9.0 software. The homogeneity of means was determined using Duncan Multiple Range  
115 Test (DMRT).

116 **Table 1:** The State and Local Government Area of the sample stations in Southwest, Nigeria

| Location of Cocoa Farms | No. of Sample Stations | Local Govt. Area | State |
|-------------------------|------------------------|------------------|-------|
| Obáfẹmi-Owódé           | 2                      | Abeokuta         | Ogun  |
| Adaàgbà                 | 1                      | Ife South        | Osun  |
| Owódé-Igàngán           | 2                      | Àtákúnmòsà East  | Osun  |
| Iyánfoworogi            | 1                      | Ife South        | Osun  |
| Owenà                   | 2                      | Ondo East        | Ondo  |
| Wáàsìmi                 | 1                      | Ondo East        | Ondo  |
| Mòyè village            | 1                      | Ọnà-Arà          | Oyo   |
| Dáagi-Lógbà             | 1                      | Ìddó             | Oyo   |
| Olórò village           | 1                      | Ọnà-Arà          | Oyo   |

117 **Data Source:** BPD assessment (2015/2016) cocoa production season in Southwest, Nigeria

118 (© Etaware Peter Mudiaga)

119 **Table 2:** Cross Validation (CV) format

bioRxiv preprint doi: <https://doi.org/10.1101/488452>; this version posted December 5, 2018. The copyright holder for this preprint (which was not certified by peer review) is the author/funder, who has granted bioRxiv a license to display the preprint in perpetuity. It is made available under aCC-BY 4.0 International license.

| <b>BPD Outbreak (Live)</b> | <b>BPD Outbreak (Predicted)</b> | <b>Inference</b> |
|----------------------------|---------------------------------|------------------|
| 100 Cocoa stands affected  | 100% Disease Prediction         | 100% Accuracy    |
| 100 Cocoa stands affected  | 90% Disease Prediction          | 90% Accuracy     |
| 100 Cocoa stands affected  | 80% Disease Prediction          | 80% Accuracy     |
| 100 Cocoa stands affected  | 70% Disease Prediction          | 70% Accuracy     |
| 100 Cocoa stands affected  | 60% Disease Prediction          | 60% Accuracy     |
| 100 Cocoa stands affected  | 50% Disease Prediction          | 50% Accuracy     |
| 100 Cocoa stands affected  | 40% Disease Prediction          | 40% Accuracy     |
| 100 Cocoa stands affected  | 30% Disease Prediction          | 30% Accuracy     |
| 100 Cocoa stands affected  | 20% Disease Prediction          | 20% Accuracy     |
| 100 Cocoa stands affected  | 10% Disease Prediction          | 10% Accuracy     |
| 100 Cocoa stands affected  | 0% Disease Prediction           | 0% Accuracy      |

120  
121

(© Etaware Peter Mudiaga)

122 **Results**

123 The developed black pod disease function was modeled using simple mathematical rule

124  $Y = F(x) = ax + b$

125 Where, a = Integer, x = independent variable, b = Constant, Y = Response variable and F = The

126 Function of the variable x

127 Thus,

128  $BPD\ Outbreak = F(Host\ x\ Pathogen\ x\ Environment) = a(Host\ x\ Pathogen\ x\ Environment) + b$

129 Mathematically,

130 Recall,  $Y = F(x) = ax + b$

131 Then,  $D = F(HPE) = a(HPE) + b \dots\dots\dots 1$

132 In any case the influence of man and vectors (Ants, Termites, and Rodents etc.) serve as constants

133 bioRxiv preprint doi: <https://doi.org/10.1101/488452>; this version posted December 5, 2018. The copyright holder for this preprint (which was not certified by peer review) is the author/funder, who has granted bioRxiv a license to display the preprint in perpetuity. It is made available under aCC-BY 4.0 International license.

134 timely combination of the key factors responsible for black pod disease development.

135 BPD Outbreak = F(Host x Pathogen x Environment) = a(Host x Pathogen x Environment) + Time  
136 + Man

137 Mathematically,

138 Recall,  $Y = F(x) = ax + b$

139 Then,  $D = F(HPE) = a(HPE) + T + M$ .....2

140 Where, D = BPD Outbreak, H = Host, P = Pathogen, T = Time, M = man, E = Environment, x =  
141 HPE, BPD = Black pod disease, and  $b = (T + M)$

142 Therefore, if the disease equation is differentiated with respect to the timing of occurrence, then the  
143 equation below becomes a derivative of the first order differentiation for BPD outbreak.

144  $\frac{\delta D}{\delta T} = \frac{\delta D}{\delta H}(HPE) + \frac{\delta D}{\delta P}(HPE) + \frac{\delta D}{\delta E}(HPE)$  .....3  
145

146 The forecast models were structured using the Multiple Regression Equation (MRM):

147  $Y = \beta_0 + \beta_1 X_1 + \beta_2 X_2 + \beta_3 X_3 + \beta_4 X_4 + \beta_5 X_5 + \dots + \beta_n X_n + \epsilon$

148 Since  $\alpha = \beta_0$ ,  $Y = \alpha + \beta_1 X_1 + \beta_2 X_2 + \beta_3 X_3 + \beta_4 X_4 + \beta_5 X_5 + \dots + \beta_n X_n + \epsilon$

149 Where, Y = Response variable,  $X_1, X_2, X_3, X_4, X_5, \dots, X_n$  = Predictors,  $\beta_1, \beta_2, \beta_3, \beta_4, \beta_5, \dots, \beta_n$  = The  
150 slopes,  $\alpha$  = General constant and  $\epsilon$  = The error factor for the predictors [7]

151 Therefore, the development of black pod disease forecast system for cocoa required an equation  
152 encompassing all the predictors necessary for the disease development. An example of such model  
153 was given thus:

154  $Y = \alpha + \beta_1(\text{Disease Incidence}) + \beta_2(\text{Disease Severity}) + \beta_3(\text{Inoculum Size}) + \beta_4(\text{Rainfall}) +$   
155  $\beta_5(\text{Temperature}) + \beta_6(\text{Humidity}) + \beta_7(\text{Sunlight Duration}) + \beta_8(\text{Wind Speed}) + \beta_9(\text{Time})$   
156  $+ \beta_{10}(\text{Pressure}) + \epsilon$

157 Or

158  $Y = \beta_0 + \beta_1(\text{Disease Incidence}) + \beta_2(\text{Disease Severity}) + \beta_3(\text{Inoculum Size}) + \beta_4(\text{Rainfall}) +$   
159  $\beta_5(\text{Temperature}) + \beta_6(\text{Humidity}) + \beta_7(\text{Sunlight Duration}) + \beta_8(\text{Wind Speed}) +$   
160  $\beta_9(\text{Time}) + \beta_{10}(\text{Pressure}) + \epsilon$



161 In any case the individual predictors were tested against the response variable to ascertain their

162 role(s) in black pod disease outbreak. In some cases, the relationship of a predictor to the response  
bioRxiv preprint doi: <https://doi.org/10.1101/488452>; this version posted December 5, 2018. The copyright holder for this preprint (which was not certified by peer review) is the author/funder, who has granted bioRxiv a license to display the preprint in perpetuity. It is made available under aCC-BY 4.0 International license.

163 variable was in the reverse order, this was still acceptable. In a situation whereby a chosen predictor

164 has no established relationship with the response variable, then that predictor was discarded (Fig 2).

165 Rainfall and average relative humidity had a positive correlation with BPD outbreak ( $r = 0.445$  and

166  $0.477$ , and  $r^2 = 0.105$  and  $0.295$ , respectively) as shown in Figs 3 and 5. The average temperature,

167 sunshine duration and the year of observation had negative association with BPD outbreak in

168 Southwest, Nigeria ( $r = -0.420$ ,  $-0.364$  and  $-0.018$ , and  $r^2 = 0.265$ ,  $0.360$  and  $0.035$ , respectively) as

169 shown in Figs 4, 6 and 9. It was however observed that there was no relationship between the

170 locations of these cocoa farms (Fig 7) and the specific period (month) when the disease was

171 observed (Fig 8) with the outbreak of black pod disease in Nigeria.

172 **Fig 2: Relationship between BPD Outbreak and climatic factors in Southwest, Nigeria**

173 **Fig 3: Black pod disease outbreak and rainfall (1991-1995)**

174 **Fig 4: BPD Outbreak and average temperature in Southwestern Nigeria (1991-1995)**

175 **Fig 5: BPD Outbreak and average relative humidity in Southwestern Nigeria (1991-1995)**

176 **Fig 6: Black pod disease Outbreak and sunshine duration (1991-1995)**

177 **Fig 7: Black pod disease occurrence and sample station location (1991-1995)**

178 **Fig 8: Black pod disease Outbreak and period (in Months) of observation (1991-1995)**

179 **Fig 9: Black pod disease occurrence and the years of BPD documentation (1991-1995)**

180

181 **The Climate pattern of Southwest, Nigeria and its effects on black pod disease development**

182 The climate pattern for Southwest, Nigeria in the late 1900s (20<sup>th</sup> Century) showed that there was

183 recurrent and substantial amount of rainfall experienced in Ogun, Ondo, Osun and Oyo States from

184 March through October each year from 1991 to 1995 (Table 3). These periods possibly served as an

185 interlude for proliferation and spread of the pathogen leading to possible infection of predisposed

186 cocoa plants judging from the black pod disease occurrence report given by the Cocoa Research  
bioRxiv preprint doi: <https://doi.org/10.1101/488452>; this version posted December 5, 2018. The copyright holder for this preprint (which was not certified by peer review) is the author/funder, who has granted bioRxiv a license to display the preprint in perpetuity. It is made available under aCC-BY 4.0 International license.

187 Institute of Nigeria (CRIN) from 1985-2014 as shown in Fig 10. Also, the climatology of the 21<sup>st</sup>  
188 Century suggests that Ondo State had the highest amount of rainfall with annual rainfall value of  
189 1,317.1mm and 1,381.0mm respectively in the year 2005 and 2006. The preference for heavy  
190 rainfall took a different precedence in 2007 and 2008, with Osun State leading the group for heavy  
191 down pour. The values for these years were 1,421.7mm and 1,597.6mm respectively. Oyo State,  
192 Osun State, and Ondo State took the lead for the succeeding years down to 2016 (Table 3). This  
193 accounted for the trend of disease outbreak with regards to the availability of moisture which is a  
194 pertinent factor for the survival and proliferation of the pathogen also reflected in the disease report  
195 from CRIN (Fig 10).

196 Observations made from the prior studies conducted in the Plant Pathology/Mycology Laboratory  
197 of the Department of Botany, University of Ibadan, showed that *Phytophthora megakarya* thrived  
198 better when the ambient temperature ranged from 20°C to 30°C. The periods of the year that had  
199 maximum ambient temperatures corresponding to the optimum temperature requirement noted to  
200 support the metabolic activities of the pathogen were June, July, August, and September from 1991  
201 to 1995 (Table 4). Sadly enough, these periods served as the peak periods for cocoa production in  
202 Southwest, Nigeria. Also, the minimum temperature all year round i.e. 1985 to 2013 (Fig 10)  
203 favoured the proliferation of the pathogen where other pertinent factors are available for pre-  
204 penetration, penetration and infection (Table 5).

205 It was observed from the climate pattern of the Southwest that from March through October from  
206 the early morning readings taken in 1991 to 1995 that a relatively humid atmosphere of 75% and  
207 above was recorded monthly which favoured the establishment of black pod disease suggesting the  
208 possibility of infection within these periods (Table 6-7). The periods of the year from 1991 to 1995  
209 with afternoon Relative humidity readings of 75% and above was June, July, August and September  
210 across all the years investigated and within all the States analysed, favours disease proliferation (Fig

211 10). Also, the mean amount of saturated vapour present in the atmosphere from 1985 through 2014  
212 also favoured the establishment of black pod disease in Southwest, Nigeria (Fig 10). The overall  
213 diagnosis was an indication of the parameter pertinent for disease establishment and when they  
214 combine favourably in favour of the noxious pathogen (*Phytophthora megakarya*), they can aid the  
215 proliferation, ramification and destruction of cocoa pods both ripe and unripe that falls within their  
216 path of travel.

217 **Fig 10: Black pod disease pestilence in the Southwest of Nigeria**

219 **Table 3:** Monthly rainfall distribution for the Southwest, States of Nigeria

| State       | Year | Rainfall (mm)/Months |       |        |       |       |       |       |       |       |       |      |      |
|-------------|------|----------------------|-------|--------|-------|-------|-------|-------|-------|-------|-------|------|------|
|             |      | Jan                  | Feb   | Mar    | April | May   | June  | July  | Aug   | Sept  | Oct   | Nov  | Dec  |
| <b>Ogun</b> | 1991 | 2.50                 | 60.0  | 38.1   | 118.1 | 127.1 | 179   | 236.2 | 84.3  | 194.4 | 129.4 | 0.00 | 4.00 |
|             | 1992 | 0.00                 | 0.00  | 8.40   | 149.7 | 116.9 | 175.7 | 235   | 44.3  | 224.3 | 105.5 | 20.7 | TR   |
|             | 1993 | NA                   | NA    | NA     | NA    | NA    | NA    | NA    | NA    | NA    | NA    | NA   | NA   |
|             | 1994 | 12.1                 | 1.6   | 124.1  | 60.2  | 82.9  | 120.7 | 130.5 | 21.2  | 212.5 | 212.5 | 15.7 | 0.00 |
|             | 1995 | 0.00                 | 4.00  | 150.6  | 124.8 | 220.1 | 120.8 | 133   | 195.7 | 163.5 | 97.1  | NA   | NA   |
| <b>Ondo</b> | 1991 | 1.20                 | 98.6  | 136    | 223.2 | 201.2 | 163.7 | 463   | 203.6 | 200.7 | 152.6 | TR   | 10.4 |
|             | 1992 | 0.00                 | 0.00  | 40.8   | 107.8 | 151.1 | 127   | 265.3 | 101.7 | 347.6 | 194.6 | 25.6 | 0.00 |
|             | 1993 | NA                   | NA    | NA     | NA    | NA    | NA    | NA    | NA    | NA    | NA    | NA   | NA   |
|             | 1994 | 31.3                 | 50.9  | 74.5   | 186.2 | 192.2 | 263.3 | 305.7 | 271.4 | 219.1 | 65.7  | 39.2 | 0.00 |
|             | 1995 | 0.00                 | 28.4  | 128    | 196.3 | 146.4 | 214.2 | 268.6 | 379.6 | 262.3 | 87.3  | 14.2 | 0.00 |
| <b>Oyo</b>  | 1991 | TR                   | 165.5 | 19.0   | 174.1 | 135.3 | 82.3  | 219.9 | 191.4 | 170.4 | 182.8 | 2.2  | 26.4 |
|             | 1992 | 0.00                 | 0.00  | 28.5   | 92.9  | 103.6 | 237.4 | 202.3 | 107.8 | 127.4 | 152.5 | 36.2 | 0.00 |
|             | 1993 | 0.00                 | NA    | 141..7 | 44    | 145.9 | 187.5 | 262   | NA    | 235.5 | 183.2 | NA   | 48.3 |
|             | 1994 | 2.10                 | 30.2  | 20.7   | 75.4  | NA    | 62.9  | 177.4 | 125.9 | 128.8 | 112.7 | 17.6 | 0.00 |
|             | 1995 | 0.00                 | 11.4  | 106.3  | 118.5 | 256.6 | 267.8 | 188.9 | 188.1 | 84.9  | 185.1 | 36.6 | TR   |
| <b>Osun</b> | 1991 | TR                   | 165.5 | 19.0   | 174.1 | 135.3 | 82.3  | 219.9 | 191.4 | 170.4 | 182.8 | 2.2  | 26.4 |
|             | 1992 | 0.00                 | 0.00  | 28.5   | 92.9  | 103.6 | 237.4 | 202.3 | 107.8 | 127.4 | 152.5 | 36.2 | 0.00 |
|             | 1993 | 0.00                 | NA    | 141..7 | 44.0  | 145.9 | 187.5 | 262   | NA    | 235.5 | 183.2 | NA   | 48.3 |
|             | 1994 | 2.10                 | 30.2  | 20.7   | 75.4  | NA    | 62.9  | 177.4 | 125.9 | 128.8 | 112.7 | 17.6 | 0.00 |
|             | 1995 | 0.00                 | 11.4  | 106.3  | 118.5 | 256.6 | 267.8 | 188.9 | 188.1 | 84.9  | 185.1 | 36.6 | TR   |

**Data Source:** National Bureau of Statistics (NBS)

220

221

222

223

224 **Table 4:** Mean monthly maximum temperature reading for the Southwest, States of Nigeria

| State       | Year | Max. Temperature (°C)/Months |      |      |       |      |      |      |      |      |      |      |      |
|-------------|------|------------------------------|------|------|-------|------|------|------|------|------|------|------|------|
|             |      | Jan                          | Feb  | Mar  | April | May  | June | July | Aug  | Sept | Oct  | Nov  | Dec  |
| <b>Ogun</b> | 1991 | 34.3                         | 37.4 | 35.6 | 33.7  | 32.6 | 31.6 | 29.5 | 28.4 | 30.1 | 30.5 | 33.6 | 33.6 |
|             | 1992 | 34.5                         | 37.3 | 36.3 | 35    | 32.7 | 30.3 | 38.3 | 28   | 29.2 | 31.9 | 33.2 | 34.8 |
|             | 1993 | 35.1                         | 35.8 | 34.6 | 35    | 33.1 | 31.1 | NA   | 29.7 | 30.8 | 32   | 33.6 | 33.8 |
|             | 1994 | 34                           | 36.3 | 35.6 | 34.3  | 32.5 | 31.7 | 28.5 | 29.3 | 30.4 | 31.7 | 33.9 | 35.2 |
|             | 1995 | 35.5                         | NA   | NA   | NA    | 33.1 | 31.2 | NA   | NA   | NA   | 31.5 | NA   | NA   |
| <b>Ondo</b> | 1991 | 32.2                         | 33.4 | 32.6 | 31.3  | 30.7 | 29.6 | 28.2 | 26.9 | 28.8 | 29.3 | 31.8 | 32.1 |
|             | 1992 | 33                           | 36   | 33.8 | 32.5  | 31.1 | 29   | 27   | 26.9 | 27.9 | 30   | 31.2 | 23.8 |
|             | 1993 | NA                           | NA   | NA   | NA    | NA   | NA   | NA   | NA   | NA   | NA   | NA   | NA   |
|             | 1994 | 32                           | 34.1 | 33.9 | 32.5  | 26.8 | 29   | NA   | NA   | 29   | 30.4 | 32.7 |      |
|             | 1995 | NA                           | NA   | NA   | NA    | NA   | NA   | NA   | NA   | NA   | NA   | NA   | NA   |
| <b>Oyo</b>  | 1991 | 33.5                         | 34.9 | 34.6 | 33    | 31.6 | 31   | 29.3 | 27.7 | 28.1 | 30   | 32.2 | 32   |
|             | 1992 | 32.9                         | 36.2 | 35.5 | 33.7  | 31.8 | 29.9 | 28   | 27.2 | 28.3 | 30.9 | 32.1 | 33.3 |
|             | 1993 | 33.1                         | 34.6 | 33.5 | 33.1  | 32   | 30   | NA   | 28.1 | 29.7 | NA   | 31.9 | NA   |
|             | 1994 | 32.7                         | 34.9 | 35.5 | 34    | 32   | 30.7 | 27.9 | NA   | 30   | 30.7 | 33.2 | 33.8 |
|             | 1995 | NA                           | NA   | NA   | NA    | NA   | NA   | NA   | NA   | NA   | NA   | NA   | NA   |
| <b>Osun</b> | 1991 | 33.5                         | 34.9 | 34.6 | 33    | 31.6 | 31   | 29.3 | 27.7 | 28.1 | 30   | 32.2 | 32   |
|             | 1992 | 32.9                         | 36.2 | 35.5 | 33.7  | 31.8 | 29.9 | 28   | 27.2 | 28.3 | 30.9 | 32.1 | 33.3 |
|             | 1993 | 33.1                         | 34.6 | 33.5 | 33.1  | 32   | 30   | NA   | 28.1 | 29.7 | NA   | 31.9 | NA   |
|             | 1994 | 32.7                         | 34.9 | 35.5 | 34    | 32   | 30.7 | 27.9 | NA   | 30   | 30.7 | 33.2 | 33.8 |
|             | 1995 | NA                           | NA   | NA   | NA    | NA   | NA   | NA   | NA   | NA   | NA   | NA   | NA   |

**Data Source:** National Bureau of Statistics (NBS)

225

226

227

228 **Table 5:** Mean monthly minimum temperature reading for the Southwest, States of Nigeria

| State       | Year | Minimum Temperature (°C)/Months |      |      |       |      |      |      |      |      |      |      |      |
|-------------|------|---------------------------------|------|------|-------|------|------|------|------|------|------|------|------|
|             |      | Jan                             | Feb  | Mar  | April | May  | June | July | Aug  | Sept | Oct  | Nov  | Dec  |
| <b>Ogun</b> | 1991 | 23.8                            | 26   | 25.2 | 23.7  | 24.2 | 23.8 | 23.1 | 22.7 | 22.8 | 22.6 | 24.2 | 22.5 |
|             | 1992 | 20.5                            | 24.1 | 25.5 | 23.3  | 24   | 22.9 | 22.9 | 22.6 | 22.4 | 23.2 | 22.3 | 23.2 |
|             | 1993 | 21.1                            | 24.5 | 23.7 | 24.5  | 24.2 | 23.5 | NA   | NA   | 22.8 | 23.3 | 23.8 | 22.2 |
|             | 1994 | 23.1                            | 25.1 | 24.8 | 25.1  | 23.7 | 31.2 | 22.9 | 23   | 23.2 | 22.9 | 22.5 | 20.2 |
|             | 1995 | 22.2                            | NA   | NA   | NA    | 23.9 | 23.3 | NA   | NA   | NA   | 23.3 | NA   | NA   |
| <b>Ondo</b> | 1991 | 19.6                            | 22.6 | 22.7 | 21.2  | 21.9 | 21.2 | 21   | 21.3 | 21   | 20.2 | 21.1 | 18.2 |
|             | 1992 | 15.3                            | 18.8 | 22.8 | 22.9  | 21.8 | 20.7 | 20.1 | 20.8 | 20.9 | 21.4 | 20.2 | 19   |
|             | 1993 | 17.3                            | 20.6 | 21.9 | 23.1  | 22.9 | 22   | NA   | 21.7 | 22.1 | NA   | 22.1 | NA   |
|             | 1994 | NA                              | NA   | NA   | NA    | NA   | NA   | NA   | NA   | NA   | NA   | NA   | NA   |
|             | 1995 | 19.6                            | 21.7 | 22.9 | 22.4  | NA   | 21.2 | NA   | NA   | 21.7 | 21.2 | 20.7 | NA   |
| <b>Oyo</b>  | 1991 | 22.9                            | 24.0 | 24.4 | 23.2  | 23.3 | 23   | 22.5 | 21.8 | 22.0 | 21.5 | 23.3 | 21.8 |
|             | 1992 | 20.2                            | 22.9 | 24.3 | 23.8  | 23.3 | 22.9 | 22   | 21.4 | 21.7 | 22.1 | 21.9 | 22.4 |
|             | 1993 | 20.9                            | NA   | 22.9 | 23.5  | 23.3 | 22.4 | 22   | NA   | 21.8 | 22.3 | NA   | 22.2 |
|             | 1994 | 22.4                            | 24.1 | 24.3 | 23.9  | 22.7 | 22.3 | 21.9 | NA   | 22.6 | 22.2 | 22.4 | 20.4 |
|             | 1995 | NA                              | NA   | NA   | NA    | NA   | NA   | NA   | NA   | NA   | NA   | NA   | NA   |
| <b>Osun</b> | 1991 | 22.9                            | 24.0 | 24.4 | 23.2  | 23.3 | 23   | 22.5 | 21.8 | 22.0 | 21.5 | 23.3 | 21.8 |
|             | 1992 | 20.2                            | 22.9 | 24.3 | 23.8  | 23.3 | 22.9 | 22   | 21.4 | 21.7 | 22.1 | 21.9 | 22.4 |
|             | 1993 | 20.9                            | NA   | 22.9 | 23.5  | 23.3 | 22.4 | 22   | NA   | 21.8 | 22.3 | NA   | 22.2 |
|             | 1994 | 22.4                            | 24.1 | 24.3 | 23.9  | 22.7 | 22.3 | 21.9 | NA   | 22.6 | 22.2 | 22.4 | 20.4 |
|             | 1995 | NA                              | NA   | NA   | NA    | NA   | NA   | NA   | NA   | NA   | NA   | NA   | NA   |

**Data Source:** National Bureau of Statistics (NBS)

229

230

231

232 **Table 6:** Relative Humidity values for the Southwest, States of Nigeria

| State       | Year | Relative Humidity in the morning at 9.00GMT (%) / Months |     |     |       |     |      |      |     |      |     |     |     |
|-------------|------|----------------------------------------------------------|-----|-----|-------|-----|------|------|-----|------|-----|-----|-----|
|             |      | Jan                                                      | Feb | Mar | April | May | June | July | Aug | Sept | Oct | Nov | Dec |
| <b>Ogun</b> | 1991 | 81                                                       | 64  | 81  | 84    | 83  | 87   | 90   | 89  | 87   | 87  | 84  | 78  |
|             | 1992 | 55                                                       | 70  | 76  | 81    | 83  | 85   | 89   | 89  | 88   | 86  | 76  | 78  |
|             | 1993 | 53                                                       | 80  | 77  | 78    | 82  | 85   | NA   | 87  | 87   | 85  | 89  | 78  |
|             | 1994 | 73                                                       | 78  | 80  | 79    | 83  | 84   | 88   | 87  | 86   | 85  | 80  | 64  |
|             | 1995 | 87                                                       | NA  | NA  | NA    | 82  | 85   | NA   | NA  | NA   | NA  | 85  | NA  |
| <b>Ondo</b> | 1991 | 75                                                       | 79  | 81  | 83    | 84  | 85   | 89   | 89  | 86   | 84  | 78  | 67  |
|             | 1992 | 48                                                       | 54  | 75  | 79    | 82  | 84   | 88   | 87  | 89   | 83  | 72  | 69  |
|             | 1993 | 48                                                       | 68  | 71  | 76    | 77  | 82   | NA   | NA  | NA   | NA  | NA  | NA  |
|             | 1994 | 69                                                       | 72  | 76  | 79    | NA  | NA   | NA   | 85  | 85   | 82  | 71  | NA  |
|             | 1995 | NA                                                       | NA  | NA  | NA    | NA  | NA   | NA   | NA  | NA   | NA  | NA  | NA  |
| <b>Oyo</b>  | 1991 | 70                                                       | 78  | 76  | 81    | 81  | 83   | 88   | 88  | 85   | 84  | 79  | 70  |
|             | 1992 | 50                                                       | 63  | 73  | 78    | 80  | 84   | 88   | 87  | 87   | 82  | 73  | 75  |
|             | 1993 | 48                                                       | NA  | 75  | 78    | 80  | 83   | 86   | NA  | 85   | 83  | NA  | 73  |
|             | 1994 | 68                                                       | 73  | 74  | 75    | 82  | 81   | 89   | NA  | 86   | 83  | 74  | 57  |
|             | 1995 | NA                                                       | NA  | NA  | NA    | NA  | NA   | NA   | NA  | NA   | NA  | NA  | NA  |
| <b>Osun</b> | 1991 | 70                                                       | 78  | 76  | 81    | 81  | 83   | 88   | 88  | 85   | 84  | 79  | 70  |
|             | 1992 | 50                                                       | 63  | 73  | 78    | 80  | 84   | 88   | 87  | 87   | 82  | 73  | 75  |
|             | 1993 | 48                                                       | NA  | 75  | 78    | 80  | 83   | 86   | NA  | 85   | 83  | NA  | 73  |
|             | 1994 | 68                                                       | 73  | 74  | 75    | 82  | 81   | 89   | NA  | 86   | 83  | 74  | 57  |
|             | 1995 | NA                                                       | NA  | NA  | NA    | NA  | NA   | NA   | NA  | NA   | NA  | NA  | NA  |

233 **Data Source:** National Bureau of Statistics (NBS)

234

235

236 **Table 7:** Relative Humidity values for the Southwest of Nigeria

| Relative Humidity in the afternoon at 15.00GMT |      |     |     |     |       |     |      |      |     |      |     |     |     |
|------------------------------------------------|------|-----|-----|-----|-------|-----|------|------|-----|------|-----|-----|-----|
| State                                          | Year | Jan | Feb | Mar | April | May | June | July | Aug | Sept | Oct | Nov | Dec |
| <b>Ogun</b>                                    | 1991 | 48  | 54  | 38  | 63    | 72  | 73   | 79   | 80  | 74   | 73  | 35  | 47  |
|                                                | 1992 | 31  | 31  | 47  | 57    | 70  | 74   | 82   | 80  | 75   | 69  | 56  | 45  |
|                                                | 1993 | 28  | 41  | 50  | 58    | 67  | 75   |      | 74  | 75   | 67  | 59  | 48  |
|                                                | 1994 | 46  | 37  | 52  | 59    | 68  | 71   | 81   | 73  | 74   | 67  | 52  | 35  |
|                                                | 1995 | 35  | NA  | NA  | NA    | 69  | 75   | NA   | NA  | NA   | NA  | 70  | NA  |
| <b>Ondo</b>                                    | 1991 | 44  | 50  | 55  | 64    | 71  | 71   | 79   | 81  | 73   | 70  | 53  | 40  |
|                                                | 1992 | 27  | 21  | 45  | 60    | 64  | 74   | 81   | 77  | 78   | 67  | 52  | 41  |
|                                                | 1993 | 28  | 35  | 48  | 55    | 64  | 66   | NA   | NA  | NA   | NA  | NA  | NA  |
|                                                | 1994 | 45  | 37  | 50  | 58    | NA  | NA   | NA   | 75  | 75   | 69  | 53  | NA  |
|                                                | 1995 | NA  | NA  | NA  | NA    | NA  | NA   | NA   | NA  | NA   | NA  | NA  | NA  |
| <b>Oyo</b>                                     | 1991 | 43  | 49  | 50  | 58    | 67  | 69   | 78   | 79  | 71   | 67  | 54  | 45  |
|                                                | 1992 | 32  | 27  | 44  | 55    | 65  | 71   | 77   | 77  | 73   | 63  | 55  | 46  |
|                                                | 1993 | NA  | NA  | NA  | NA    | NA  | NA   | NA   | NA  | NA   | NA  | NA  | NA  |
|                                                | 1994 | 46  | 38  | 46  | 57    | 64  | 67   | 80   | NA  | 72   | 66  | 49  | 36  |
|                                                | 1995 | NA  | NA  | NA  | NA    | NA  | NA   | NA   | NA  | NA   | NA  | NA  | NA  |
| <b>Osun</b>                                    | 1991 | 43  | 49  | 50  | 58    | 67  | 69   | 78   | 79  | 71   | 67  | 54  | 45  |
|                                                | 1992 | 32  | 27  | 44  | 55    | 65  | 71   | 77   | 77  | 73   | 63  | 55  | 46  |
|                                                | 1993 | NA  | NA  | NA  | NA    | NA  | NA   | NA   | NA  | NA   | NA  | NA  | NA  |
|                                                | 1994 | 46  | 38  | 46  | 57    | 64  | 67   | 80   | NA  | 72   | 66  | 49  | 36  |
|                                                | 1995 | NA  | NA  | NA  | NA    | NA  | NA   | NA   | NA  | NA   | NA  | NA  | NA  |

**Data Source:** National Bureau of Statistics (NBS)

237

238

239



240 **Development of prediction models for black pod disease in Nigeria**

bioRxiv preprint doi: <https://doi.org/10.1101/488452>; this version posted December 5, 2018. The copyright holder for this preprint (which was not certified by peer review) is the author/funder, who has granted bioRxiv a license to display the preprint in perpetuity. It is made available under aCC-BY 4.0 International license.

241 Several models were developed to assess the level of black pod disease development and its spread  
242 within the Southwest of Nigeria.

243 **Model 1 (MRM<sub>1</sub>)**

244 General Equation (1991-1995)

$$245 Y = \alpha + \beta_1 X_1 + \beta_2 X_2 - \beta_3 X_3 + \beta_4 X_4 - \beta_5 X_5 - \beta_6 X_6 + \beta_7 X_7 - \beta_8 X_8 - \beta_9 X_9$$

$$246 \text{BPD Outbreak (\%)} = 124.8 + 0.03 (\text{Month}) + 0.01(\text{State}) - 0.06 (\text{Year}) + 0.002 (\text{Rainfall}) - 0.003 \\ 247 (\text{Max. Temperature}) - 0.04 (\text{Min. Temperature}) + 0.01 (\text{Relative Humidity [Morning]}) - \\ 248 0.0003 (\text{Relative Humidity [Afternoon]}) - 0.05 (\text{Sunshine Duration})$$

249 **Model 2 (MRM<sub>2</sub>)**

250 General Equation (1991-1995)

$$251 Y = \alpha + \beta_1 X_1 + \beta_2 X_2 - \beta_3 X_3 + \beta_4 X_4 - \beta_5 X_5 + \beta_6 X_6 - \beta_7 X_7$$

$$252 \text{BPD Outbreak (\%)} = 129.9 + 0.03 (\text{Month}) + 0.005 (\text{State}) - 0.06 (\text{Year}) + 0.001 (\text{Rainfall}) - 0.03 \\ 253 (\text{Average Temperature}) + 0.005 (\text{Average Relative Humidity}) - 0.04 (\text{Sunshine Duration})$$

254 **Model 3 (MRM<sub>3</sub>)**

255 General Equation (1991-1995)

$$256 Y = \alpha + \beta_1 X_1 - \beta_2 X_2 - \beta_3 X_3 + \beta_4 X_4 - \beta_5 X_5 + \beta_6 X_6$$

$$257 \text{BPD Outbreak (\%)} = 127.8 + 0.02 (\text{Month}) - 0.002 (\text{State}) - 0.06 (\text{Year}) + 0.001 (\text{Rainfall}) - 0.05 \\ 258 (\text{Average Temperature}) + 0.007 (\text{Average Relative Humidity})$$

259 **Model 4 (MRM<sub>4</sub>)**

260 General Equation (1991-1995)

$$261 Y = \alpha - \beta_1 X_1 + \beta_2 X_2 - \beta_3 X_3 - \beta_4 X_4 - \beta_5 X_5 - \beta_6 X_6 + \beta_7 X_7 + \beta_8 X_8 - \beta_9 X_9$$

$$262 \text{BPD Outbreak (\%)} = 101 - 0.008 (\text{Month}) + 0.02 (\text{State}) - 0.05 (\text{Year}) - 0.002 (\text{Rainfall}) - 0.02 \\ 263 (\text{Max. Temperature}) - 0.06 (\text{Min. Temperature}) + 0.01(\text{Relative Humidity-Morning}) + 0.01 \\ 264 (\text{Relative Humidity-Afternoon}) - 0.1 (\text{Sunshine Duration})$$

265 **Model 5 (MRM<sub>5</sub>) - ETAPOD**

266 General Equation (1985-2014) [**Accepted Equation**]

$$267 Y = -\alpha - \beta_1 X_1 + \beta_2 X_2 + \beta_3 X_3$$

$$268 \text{BPD Outbreak (\%)} = -20.4 - 0.004 (\text{Rainfall}) + 0.272 (\text{Relative Humidity}) + 0.511 (\text{Temperature})$$

269 **Model 6 (MRM<sub>6</sub>)**

bioRxiv preprint doi: <https://doi.org/10.1101/488452>; this version posted December 5, 2018. The copyright holder for this preprint (which was not certified by peer review) is the author/funder, who has granted bioRxiv a license to display the preprint in perpetuity. It is made available under aCC-BY 4.0 International license.

270 General Equation (1991-1995)

271  $Y = \alpha + \beta_1 X_1 - \beta_2 X_2 + \beta_3 X_3 - \beta_4 X_4 - \beta_5 X_5 + \beta_6 X_6 - \beta_7 X_7$

272 BPD Outbreak (%) = 101.6 - 0.007 (Month) + 0.02 (State) - 0.05 (Year) - 0.002 (Rainfall) - 0.07  
273 (Average Temperature) + 0.02 (Average Relative Humidity) - 0.1 (Sunshine Duration)

274 **Model 7 (MRM<sub>7</sub>)**

275 General Equation (1985-2014)

276  $Y = -\alpha - \beta_1 X_1 + \beta_2 X_2 - \beta_3 X_3 + \beta_4 X_4$

277 BPD Outbreak (%) = -1364 - 0.00099 (Rainfall) + 0.008 (Relative Humidity) - 1.38 (Temperature)  
278 + 0.705 (Year)

279 **Model 8 (MRM<sub>8</sub>)**

280 General Equation (1991-1995)

281  $Y = -\alpha - \beta_1 X_1 - \beta_2 X_2 + \beta_3 X_3 - \beta_4 X_4$

282 BPD Outbreak (%) = -1.64 - 0.00152 (Rainfall) - 0.0727 (Average Temperature) + 0.02 (Average  
283 Relative Humidity) - 0.119 (Sunshine Duration)

284 **Model Selection**

285 Preliminary screening of the developed models was done using the co-efficient of correlation (R-  
286 Sq). The five (5) best fitted models (MRM<sub>1</sub>, MRM<sub>2</sub>, MRM<sub>3</sub>, MRM<sub>4</sub>, and MRM<sub>5</sub>) for black pod  
287 disease prediction were considered for further validation prior to final selection. The posthoc  
288 analysis conducted showed that MRM<sub>5</sub> was the preferred model for black pod disease prediction  
289 followed by MRM<sub>4</sub>>MRM<sub>1</sub>>MRM<sub>2</sub>>MRM<sub>3</sub> in terms of the Standard Error of Regression (SER)  
290 which was given as 0.22, 0.39, 0.45, 0.45, and 0.45 respectively; Root Mean Square Error of  
291 Prediction (RMSE<sub>pred.</sub>): 0.30, 0.39, 0.46, 0.46 and 0.46 respectively; and the Adjusted Co-efficient  
292 of Correlation (R-Sq<sub>Adj.</sub>): 0.67, 0.49, 0.32, 0.32 and 0.31 for MRM<sub>5</sub>, MRM<sub>4</sub>, MRM<sub>1</sub>, MRM<sub>2</sub>, and  
293 MRM<sub>3</sub>. The preferred model MRM<sub>5</sub> was named “ETAPOD” (Fig 11)

294 **Fig 11: MRM<sub>5</sub> BPD prediction Model (ETAPOD)**

295

## 296 **Prediction of black pod disease and validation of results**

bioRxiv preprint doi: <https://doi.org/10.1101/488452>; this version posted December 5, 2018. The copyright holder for this preprint (which was not certified by peer review) is the author/funder, who has granted bioRxiv a license to display the preprint in perpetuity. It is made available under a [CC-BY 4.0 International license](#).

297 The predicted level of black pod disease outbreak for Ogun State was 9.97% in May, June  
298 (11.54%), July (12.25%), August (11.24%), September (9.86%), October (9.24%), November  
299 (5.95%), December (2.25%) in 2015 and 1.03% for January, February (2.81%), March (4.74%),  
300 April (7.42%), May (9.97%), in 2016 (Fig 12). That of Ondo State was predicted thus: May, 2015  
301 (8.58%); June, 2015 (9.05%); July, 2015 (11.48%); August, 2015 (10.26%); September, 2015  
302 (10.09%); October, 2015 (8.17%); November, 2015 (4.50%) and December, 2015 (0.76%). While  
303 the predictions for 2016 was given thus: January (-1.40%), February (-0.04%), March (4.32%),  
304 April (6.48%), and May (8.58%), respectively (Fig 13).

305 For Osun State, black pod disease outbreak was predicted in 2015 as follows: May (8.64%), June  
306 (9.43%), July (11.82%), August (10.34%), September (10.26%), October (7.80%), November  
307 (4.94%), and December (1.67%); that of 2016 was predicted thus January (0.04%), February  
308 (1.25%), March (4.69%), April (6.89%) and May (8.64%) as shown in Fig 14. Finally, the  
309 predictions for Oyo State was as follow: May (8.69%), June (9.43%), July (11.77%), August  
310 (10.39%), September (9.98%), October (7.80%), November (4.95%), December (1.67%) for 2015  
311 and January (0.21%), February (1.29%), March (4.57%), April (6.87%) and May (8.69%) for 2016  
312 growing season (Fig 15). A comparison was drawn with the observed values obtained in the field  
313 for the 2015/2016 cocoa production season.

## 314 **Result Validation: Predicted (Computer Simulations) versus Observed BPD Outbreak**

315 The predicted and actual black pod disease occurrence within the States where the study areas  
316 where located were compared to determine their level of accuracy. The major season for cocoa  
317 production was considered. Black pod disease outbreak for Ondo in the month of June was  
318 predicted as 9.05% and the actual observation made in the field was 9.5%, it was predicted as  
319 11.5% in July (Actual observation was 18.0%), in August, predicted result of BPD outbreak was  
320 10.3% (Actual BPD outbreak was 26.5%), in September (Predicted BPD Outbreak = 10.1%, Actual

321 BPD Outbreak =11.0%), and in October (Predicted BPD Outbreak = 8.17%, while Actual BPD  
322 Outbreak = 5.0%) as stated in Table 8.

bioRxiv preprint doi: <https://doi.org/10.1101/488452>; this version posted December 5, 2018. The copyright holder for this preprint (which was not certified by peer review) is the author/funder, who has granted bioRxiv a license to display the preprint in perpetuity. It is made available under aCC-BY 4.0 International license.

323 In Osun, the predicted BPD Outbreak for June was 9.43% (Actual BPD Outbreak = 9.0%), in July  
324 (Predicted BPD Occurrence = 11.8%, Actual BPD Occurrence = 13.5%), August (Predicted BPD  
325 Outbreak = 10.3%, Actual BPD Incidence = 8.0%), in September (Predicted Outbreak for black pod  
326 disease = 10.3%, Actual Value = 11.5%), and October (Predicted Result = 7.8%, Actual Occurrence  
327 = 10.0%). The predictions of black pod disease made by ETAPOD for Ogun was [June (Predicted  
328 BPD Incidence = 11.5%, Actual BPD Occurrence = 0.0%), July (Predicted BPD Incidence =  
329 12.2%, Actual BPD Incidence = 0.0%), August (Predicted BPD Incidence = 11.2%, Actual BPD  
330 Outbreak = 3.0%), September (Predicted BPD Outbreak = 9.86%, Actual BPD Occurrence =  
331 15.0%), and October (Predicted BPD Outbreak = 9.23%, Actual BPD Outbreak = 22.0%)]. Finally,  
332 that of Oyo State was given thus: June (9.43%, 0.0%), July (11.8%, 6.0%), August (10.4%, 16.0%),  
333 September (9.98%, 14.0%), and October (7.8%, 0.0%) for both predicted and actual black pod  
334 disease outbreak (Table 9). Predictions on BPD outbreak made by ETAPOD showed that the  
335 Monthly BPD Outbreak (MBO), the Total Annual BPD Outbreak (TAO) and the Average Annual  
336 BPD Outbreak (AAO) for some selected stations i.e. Qwenà and Wáásimi were 9.05, 72.3 and 6.0%  
337 compared with observed BPD values of 9.5, 70.0, and 5.8%, respectively. Adaàgbà, Iyánfoworogi,  
338 and Owódé-Igàngán had 9.43, 77.8, and 6.5% as their predicted BPD values compared with the  
339 observed values of 9.0, 53.5, and 4.46%, respectively as shown in Figs 12-15.

340 **Plate 12: BPD outbreak predictions in Ogun State (2015/2016)**

341 **Plate 13: BPD outbreak predictions in Ondo State (2015/2016)**

342 **Plate 14: BPD outbreak predictions in Osun State (2015/2016)**

343 **Plate 15: BPD outbreak predictions in Oyo State (2015/2016)**

344

345 **Performance of MRM<sub>5</sub> forecast model (ETAPOD)**

bioRxiv preprint doi: <https://doi.org/10.1101/488452>; this version posted December 5, 2018. The copyright holder for this preprint (which was not certified by peer review) is the author/funder, who has granted bioRxiv a license to display the preprint in perpetuity. It is made available under a [CC-BY 4.0 International license](#).

346 It was also observed that the range of disparity between the observed and predicted values for Ondo  
347 State was between -8.58% and 16.2%, Osun (-7.14% and 2.20%), Ogun (-11.5% and 12.8%) and  
348 Oyo (-9.43% and 5.60%) as recorded in Table 9. The estimated performance of the developed black  
349 pod disease occurrence forecast model was rated as follows: Ondo State had good black pod disease  
350 predicted values for the months of June, July, August, September 2015, January and February 2016;  
351 whereas, fair black pod disease occurrence was experienced in the months of October, November,  
352 December 2015 and March, 2016. Osun State had good black pod disease predicted values for the  
353 months of July, September, October 2015, and January 2016; and fair black pod disease predicted  
354 values for the months of June, August, November, December 2015, February and March 2016.  
355 Ogun State had black pod disease values predicted correctly for the months of September and  
356 October 2015 only; whereas, there was a series of fair black pod incidence predicted values within  
357 the months of December 2015, January, February and March 2016. Finally, for Oyo State there was  
358 good black pod disease prevalence values predicted for the months of August and September 2015  
359 only, and fair predicted black pod disease occurrence values for the months of November,  
360 December 2015, January, February, and March 2016 as shown in Table 10.

361

362

363

364

365

366

367

368 **Table 8:** BPD outbreak both in the field and feedback information from MRM<sub>5</sub> (ETAPOD)

bioRxiv preprint doi: <https://doi.org/10.1101/488452>; this version posted December 5, 2018. The copyright holder for this preprint (which was not certified by peer review) is the author/funder, who has granted bioRxiv a license to display the preprint in perpetuity. It is made available under aCC-BY 4.0 International license.

| Period  | Black Pod Disease Occurrence (%) |           |          |           |          |           |          |           |
|---------|----------------------------------|-----------|----------|-----------|----------|-----------|----------|-----------|
|         | Ondo                             |           | Osun     |           | Ogun     |           | Oyo      |           |
|         | Observed                         | Predicted | Observed | Predicted | Observed | Predicted | Observed | Predicted |
| 05/2015 | 0.0                              | 8.58      | 1.5      | 8.64      | 0.0      | 9.97      | 0.0      | 8.69      |
| 06/2015 | 9.5                              | 9.05      | 9.0      | 9.43      | 0.0      | 11.5      | 0.0      | 9.43      |
| 07/2015 | 18.0                             | 11.5      | 13.5     | 11.8      | 0.0      | 12.2      | 6.0      | 11.8      |
| 08/2015 | 26.5                             | 10.3      | 8.0      | 10.3      | 3.0      | 11.2      | 16.0     | 10.4      |
| 09/2015 | 11.0                             | 10.1      | 11.5     | 10.3      | 15.0     | 9.86      | 14.0     | 9.98      |
| 10/2015 | 5.0                              | 8.17      | 10.0     | 7.80      | 22.0     | 9.23      | 0.0      | 7.80      |
| 11/2015 | 0.0                              | 4.50      | 0.0      | 4.94      | 0.0      | 5.95      | 0.0      | 4.95      |
| 12/2015 | 0.0                              | 0.76      | 0.0      | 1.67      | 0.0      | 2.25      | 0.0      | 1.67      |
| 01/2016 | 0.0                              | -1.40     | 0.0      | 0.05      | 0.0      | 1.03      | 0.0      | 0.21      |
| 02/2016 | 0.0                              | -0.04     | 0.0      | 1.25      | 0.0      | 2.81      | 0.0      | 1.29      |
| 03/2016 | 0.0                              | 4.32      | 0.0      | 4.69      | 0.0      | 4.74      | 0.0      | 4.57      |
| 04/2016 | 0.0                              | 6.48      | 0.0      | 6.88      | 0.0      | 7.43      | 0.0      | 6.87      |
| 05/2016 | 0.0                              | 8.58      | 0.0      | 8.64      | 0.0      | 9.97      | 0.0      | 8.69      |

369 **Note:** The predicted values are the minimum expected values for black pod disease occurrence

370

371

372

373

374

375

376

377

378

379

380

381

382

383

384

385 **Table 9:** An estimation of the difference that exist between the data set

bioRxiv preprint doi: <https://doi.org/10.1101/488452>; this version posted December 5, 2018. The copyright holder for this preprint (which was not certified by peer review) is the author/funder, who has granted bioRxiv a license to display the preprint in perpetuity. It is made available under aCC-BY 4.0 International license.

|               | <b>Estimated Difference (%)</b> |             |             |            |
|---------------|---------------------------------|-------------|-------------|------------|
| <b>Period</b> | <b>Ondo</b>                     | <b>Osun</b> | <b>Ogun</b> | <b>Oyo</b> |
| 05/2015       | -8.58                           | -7.14       | -9.97       | -8.69      |
| 06/2015       | 0.45                            | -0.43       | -11.5       | -9.43      |
| 07/2015       | 6.50                            | 1.70        | -12.2       | -5.80      |
| 08/2015       | 16.2                            | -2.30       | -8.20       | 5.60       |
| 09/2015       | 0.90                            | 1.20        | 5.14        | 4.02       |
| 10/2015       | -3.17                           | 2.20        | 12.8        | -7.80      |
| 11/2015       | -4.50                           | -4.94       | -5.95       | -4.95      |
| 12/2015       | -0.76                           | -1.67       | -2.25       | -1.67      |
| 01/2016       | 1.40                            | -0.05       | -1.03       | -0.21      |
| 02/2016       | 0.04                            | -1.25       | -2.81       | -1.29      |
| 03/2016       | -4.32                           | -4.69       | -4.74       | -4.57      |
| 04/2016       | -6.48                           | -6.88       | -7.43       | -6.87      |
| 05/2016       | -8.58                           | -8.64       | -9.97       | -8.69      |

386

387

388

389

390

391

392

393

394

395

396

397 **Table 10:** Performance rating for MRM<sub>5</sub> forecast model (ETAPOD)

bioRxiv preprint doi: <https://doi.org/10.1101/488452>; this version posted December 5, 2018. The copyright holder for this preprint (which was not certified by peer review) is the author/funder, who has granted bioRxiv a license to display the preprint in perpetuity. It is made available under a [CC-BY 4.0 International license](#).

**Quality of black pod disease occurrence prediction**

| <b>Period</b> | <b>Ondo</b> | <b>Osun</b> | <b>Ogun</b> | <b>Oyo</b> |
|---------------|-------------|-------------|-------------|------------|
| 05/2015       | -           | -           | -           | -          |
| 06/2015       | +           | -/+         | -           | -          |
| 07/2015       | +           | +           | -           | -          |
| 08/2015       | +           | -/+         | -           | +          |
| 09/2015       | +           | +           | +           | +          |
| 10/2015       | -/+         | +           | +           | -          |
| 11/2015       | -/+         | -/+         | -           | -/+        |
| 12/2015       | -/+         | -/+         | -/+         | -/+        |
| 01/2016       | +           | +           | -/+         | -/+        |
| 02/2016       | +           | -/+         | -/+         | -/+        |
| 03/2016       | -/+         | -/+         | -/+         | -/+        |
| 04/2016       | -           | -           | -           | -          |
| 05/2016       | -           | -           | -           | -          |

398 **Keynote:**

399       + = Good performance

400       -/+ = Fair Performance

401       - = Poor Performance

402

403

404

405

406

407

408

409

410

411

412



413 **The statistical error of prediction for the developed black pod disease occurrence prediction**

414 **model** bioRxiv preprint doi: <https://doi.org/10.1101/488452>; this version posted December 5, 2018. The copyright holder for this preprint (which was not certified by peer review) is the author/funder, who has granted bioRxiv a license to display the preprint in perpetuity. It is made available under a [CC-BY 4.0 International license](#).

415 The error of prediction was estimated statistically and the level of accuracy of the developed model  
416 for prediction of black pod disease occurrence was determined by simple statistical formula. The  
417 estimation of the monthly percentage error of prediction for each state was given thus: for Ondo  
418 State it was estimated to be 0.20% in the month of June 2015, July 2015 (42.25%), September 2015  
419 (0.81%), October 2015 (10.05%), November 2015 (20.25%), December 2015 (0.58%), January  
420 2016 (1.96%), February 2016 (0.0%), March 2016 (18.66%), and April 2016 (41.99%) as stated in  
421 Table 11.

422 It was noted that the statistical error of prediction of black pod disease occurrence in Osun State  
423 was low with the value estimated for the month of June 2015 being 0.18%, July 2015 (2.89%),  
424 August 2015 (5.29%), September 2015 (1.44%), October 2015 (4.84 %), November 2015 (24.4%),  
425 December 2015 (2.79%), January 2016 (0.0%), February 2016 (1.56%), March 2016 (22.0%), and  
426 April 2016 (47.33%) during the 2015/2016 cocoa production season across the Southwest of  
427 Nigeria (Table 11).

428 Ogun and Oyo States had similar estimated statistical error in black pod disease prediction.  
429 Although their estimated levels in the error of black pod disease prevalence predicted values were  
430 low, much work still need to be done to improve the quality of the result forecasted for these states.  
431 It was noted that the error of prediction for Ogun State was 26.42% for the month of September  
432 2015, 35.4% for November 2015, December 2015 (5.06%), January 2016 (1.06%), February 2016  
433 (7.9%), and March 2016 (22.47%). The statistical error of prediction for Oyo State was 33.64% for  
434 the month of July 2015, August 2015 (31.36%), September 2015 (16.16%), November 2015  
435 (24.5%), December 2015 (2.79%), January 2016 (0.04%), February 2016 (1.66%), March 2016  
436 (20.88%), and April 2016 (47.2%) as estimated in the 2015/2016 cocoa production season across  
437 the Southwest, states of Nigeria (Table 11).

438

439 **Table 11:** Percentage error in black pod disease prediction

bioRxiv preprint doi: <https://doi.org/10.1101/488452>; this version posted December 5, 2018. The copyright holder for this preprint (which was not certified by peer review) is the author/funder, who has granted bioRxiv a license to display the preprint in perpetuity. It is made available under aCC-BY 4.0 International license.

**Error in prediction of black pod disease occurrence (%)**

| Periods | $[E = (Y - \hat{Y})^2]$ |       |        |       |
|---------|-------------------------|-------|--------|-------|
|         | Ondo                    | Osun  | Ogun   | Oyo   |
| 05/2015 | 73.62                   | 50.98 | 99.40  | 75.52 |
| 06/2015 | 0.20                    | 0.18  | 132.25 | 88.92 |
| 07/2015 | 42.25                   | 2.89  | 148.84 | 33.64 |
| 08/2015 | 262.44                  | 5.29  | 67.24  | 31.36 |
| 09/2015 | 0.81                    | 1.44  | 26.42  | 16.16 |
| 10/2015 | 10.05                   | 4.84  | 163.84 | 60.84 |
| 11/2015 | 20.25                   | 24.4  | 35.4   | 24.5  |
| 12/2015 | 0.58                    | 2.79  | 5.06   | 2.79  |
| 01/2016 | 1.96                    | 0.00  | 1.06   | 0.04  |
| 02/2016 | 0.00                    | 1.56  | 7.90   | 1.66  |
| 03/2016 | 18.66                   | 22.00 | 22.47  | 20.88 |
| 04/2016 | 41.99                   | 47.33 | 55.2   | 47.2  |
| 05/2016 | 73.62                   | 74.65 | 99.4   | 75.52 |

440

441

442

443

444

445

446

447

448

449

450

## 451 **Discussion**

bioRxiv preprint doi: <https://doi.org/10.1101/488452>; this version posted December 5, 2018. The copyright holder for this preprint (which was not certified by peer review) is the author/funder, who has granted bioRxiv a license to display the preprint in perpetuity. It is made available under a [CC-BY 4.0 International license](#).

### 452 **Weather survey in line with BPD outbreak in Southwestern Nigeria**

453 The weather report in the early 1900s for Southwestern Nigeria showed that there was recurrent  
454 rainfall within the months of March through October from 1991 to 1995. Also, ambient temperature  
455 was low during the day and at night, and there was much saturated water vapour in the air across the  
456 four (4) States investigated within the same period. March to October happen to be the most  
457 productive periods for Cocoa production in Southwest, Nigeria; Therefore, the observations noted  
458 gives an indication on the possibility of infection within these periods. This favourable weather  
459 pattern for black pod disease infection was earlier reported by Akrofi [8].

### 460 **The required predictor variables**

461 The most pertinent factors needed for structuring a forecast model for the prediction of BPD  
462 outbreak in Southwest, Nigeria include weather reports for rainfall, temperature, relative humidity  
463 and sunshine duration spread across the years, a good source of cocoa yield across the selected  
464 region(s), and data recorded for black pod disease pestilence. This was in line with the requirements  
465 stipulated by Fernandes [9] as pertinent factors needed for the establishment of a good warning  
466 system.

### 467 **BPD forecast model structuring**

468 The Multiple Regression Model (MRM):  $Y = \alpha + \beta_1 X_1 + \beta_2 X_2 + \dots + \beta_n X_n$  where Y is Nx1 matrix of  
469 response variable,  $X_1, X_2, \dots, X_n$  are NxK matrices of regressors, and  $\beta_1, \beta_2, \dots, \beta_n$  regression  
470 coefficients was used in model development. Eight models (MRM<sub>1</sub>-MRM<sub>8</sub>) were fitted from real  
471 life BPD data. The performances of the models were ascertained using SER, RMSE<sub>pred</sub> and R-Sq<sub>Adj</sub>.  
472 This was as prescribed by Simon [10], Luo [11] and Wikipedia [7].

473

## 474 Accuracy of BPD outbreak predictions by ETAPOD

bioRxiv preprint doi: <https://doi.org/10.1101/488452>; this version posted December 5, 2018. The copyright holder for this preprint (which was not certified by peer review) is the author/funder, who has granted bioRxiv a license to display the preprint in perpetuity. It is made available under a [CC-BY 4.0 International license](#).

475 The MRM<sub>5</sub> model (ETAPOD) was able to predict BPD outbreak accurately in Ondo and Osun  
476 States for the major production season in Nigeria, but the predictions made for Ogun and Oyo  
477 States were slightly inaccurate suggesting and improvement in model quality. The research  
478 information generated from ETAPOD was in line with the observations made by Opoku *et al.* [1]  
479 and [12] in their research conducted in Ghana. He stated that primary infections of BPD usually  
480 occur around June, but the peak of infection generally occurs between August and October.  
481 Information on peak periods for BPD infection can be useful when planning management strategies  
482 for BPD eradication. Luo [11] also designed a forecast model for the prediction of foliar diseases of  
483 winter wheat caused by *Septoria tritici* across England and Wales and his predictions for the disease  
484 was seemingly not 100% accurate.

## 485 Supporting Information

486 **S1 Fig: BPD outbreak and the presence of abundant inoculum of the pathogen**

487 **S2 Fig: Rainfall pattern and how it affects BPD outbreak**

488 **S3 Fig: The effect of increasing temperature and BPD outbreak**

489 **S4 Fig: An increase in saturated vapour in the air and how it influence BPD outbreak**

490 **S5 Fig: Sunshine duration and how it influences BPD proliferation**

491 **S6 Fig: Wind Speed and BPD outbreak**

492 **S7 Fig: Period of cocoa pod formation/maturation and BPD infection**

493 **S8 Fig: atmospheric pressure and BPD outbreak**

494

495

## 496 **Recommendation**

bioRxiv preprint doi: <https://doi.org/10.1101/488452>; this version posted December 5, 2018. The copyright holder for this preprint (which was not certified by peer review) is the author/funder, who has granted bioRxiv a license to display the preprint in perpetuity. It is made available under a [CC-BY 4.0 International license](#).

497 ETAPOD harnesses several potentials and possibilities that can be improved on to obtain excellent  
498 results. The accuracy of the warning system developed for the prediction of black pod disease  
499 (ETAPOD) can be perfected if:

- 500 1. Weather parameters are obtained from meteorological stations situated in the farm or those  
501 closely located to the region where active cocoa production take place.
- 502 2. The level of accuracy of predicted weather reports is above 95%
- 503 3. Consistency of cocoa production within that locality is constant
- 504 4. The type of cropping system employed could be determined
- 505 5. cocoa is the major crop cultivated on the piece of land
- 506 6. Advanced digital image analysis could be used to improve measurement precision of disease  
507 prevalence and severity.

## 508 **Conclusion**

509 ETAPOD harnesses the potentials to improve the functionality of other existing management  
510 strategies for the control of black pod disease in Nigeria by providing information regarding black  
511 pod disease occurrence, detect areas under severe attack by the disease (AUSA), and discourage  
512 fungicide misuse among local cocoa farmers. ETAPOD is unique in the sense that its primary  
513 functions in terms of black pod disease prediction are not geographically bound by location and as  
514 such the developed programme can be manipulated to provide optimum results anywhere needed in  
515 Nigeria, Africa and all around the world. Its ability to provide qualitative and quantitative  
516 description of the black pod disease pressure makes it superior to other forms of black pod disease  
517 control strategies in use.

518 Therefore, ETAPOD is a pertinent tool that can effectively minimize the prevalence of black pod  
519 disease of cocoa within Nigeria with minimal chemical application, decreasing the risk of chemical

520 poisoning and increasing the production of healthy cocoa products nationwide. This is the surest  
521 and fastest way to ensuring sustainability of cocoa production in Nigeria and the world at large as a  
522 means to tackle the problem of food scarcity and unavailability of raw materials for production.

## 523 **References**

- 524 1. Opoku, I. Y., Appiah, A. A., and Akrofi, A. Y. 2000. *Phytophthora megakarya*: A potential  
525 threat to the cocoa industry in Ghana. *Ghana Journal Agricultural Science* 33:135-142.
- 526 2. Anonymous 1995. Pest and disease: **In** *Report on recent decline in cocoa production in*  
527 *Ghana and measures to revamp the industry*, Report commissioned by the Office of the  
528 President of Ghana, pp. 43-44
- 529 3. Adegbola, M.O.K. 1972. Cocoa diseases of West Africa, *7th International Cocoa Research*  
530 *Conference*, Douala, Cameroon pg179-184
- 531 4. Oluyole, K. A. and Lawal, J. O. 2008. Determinants of the occurrence of black pod disease  
532 of cocoa in Edo state, Nigeria: a multivariate probit analysis approach, Economics and  
533 Statistics Division, Cocoa Research Institute of Nigeria, Ibadan Nigeria, *Journal of*  
534 *innovative development strategy*, 2(2): 1-4
- 535 5. Agbeniyi S. O. and Adedeji A.R. 2003. Current Status of Blackpod Epidemics in Nigeria, **In**  
536 *Proceedings of 14th International Cocoa Research Conference*, pp. 1377 – 1380
- 537 6. Lawal J.O. and Emaku L.A. 2007. Evaluation of the effect of climatic changes on cocoa  
538 production in Nigeria: Cocoa Research Institute of Nigeria (CRIN) as a case study. *African*  
539 *Crop Science Conference Proceedings* (8): 423–426
- 540 7. Wikipedia 2013. Regression Analysis, [www.webcrawler.com](http://www.webcrawler.com), accessed on 25<sup>th</sup> August,  
541 2013 at 16:03 GMT

542 8. Akrofi A.Y. 2015. *Phytophthora megakarya*: a review on its status as a pathogen on cacao

543 bioRxiv preprint doi: <https://doi.org/10.1101/488452>; this version posted December 5, 2018. The copyright holder for this preprint (which was  
not certified by peer review) is the author/funder, who has granted bioRxiv a license to display the preprint in perpetuity. It is made available  
in West Africa, *African Crop Science Journal* 23(1): 1-97  
under a [CC-BY 4.0 International license](https://creativecommons.org/licenses/by/4.0/).

544 9. Fernandes J.M., Pavan W. and Sanhueza R.M. 2011. SISALERT- A generic web-based plant  
545 disease forecasting system. **In:** Salampasis M., Matopoulos A. (eds.): *Proceedings of the*  
546 *International Conference on Information and Communication Technologies for Sustainable Agri-*  
547 *production and Environment* pp. 225-233

548 10. Simon, G. 2003. Multiple regression basics. New York University press, Stern school of  
549 Business, New York pp18-58

550 11. Luo, W. 2008. Spatial/Temporal modeling of crop disease data using high-dimensional  
551 regression, Ph.D. Thesis submitted to the Department of Statistics, University of Leads,  
552 223pg

553 12. Opoku I.Y., Assuah M.K. and Aneani F. 2007b. Management of black pod disease of cocoa  
554 with reduced number of fungicide application and crop sanitation. *African Journal of*  
555 *Agricultural Research* 2:601-604

556

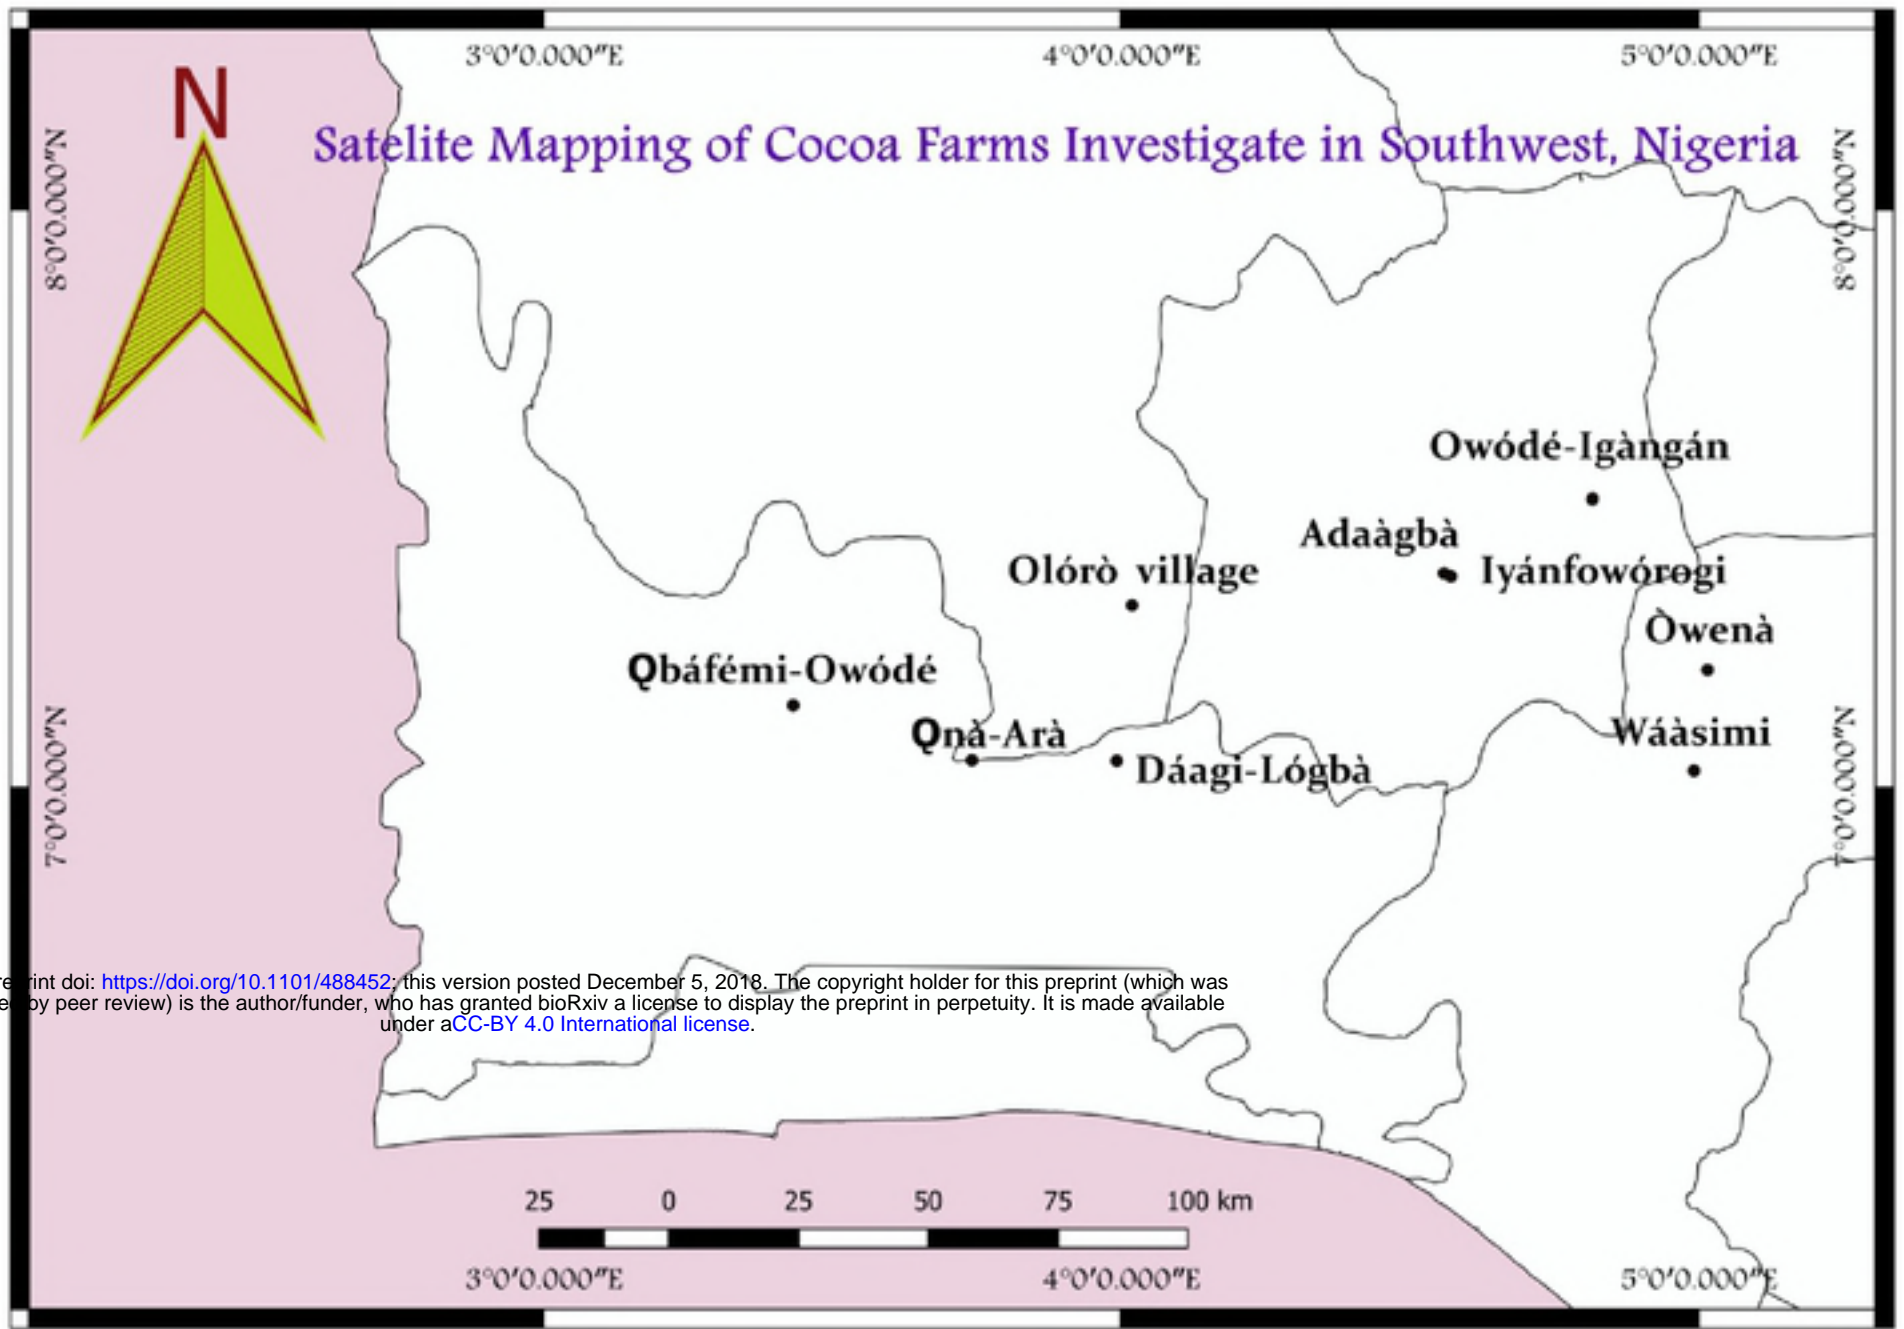

**Fig 1**
